# Supplementary material
Source: publisher site journal article supplement (https://www.dovepress.com/get_supplementary_file.php?f=341566.docx)
Supplement: Supplementary file 1 [file get_supplementary_file.php]

**Supplementary Table 1**. Bi-variable analysis comparing of the rate of moderate-to-high unmet supportive care needs according to Indigenous status

|  | **Indigenous** | **Non-Indigenous** |  |  |
| --- | --- | --- | --- | --- |
| **N=20** | **N=438** |  |
|  | **Rate* (95% CI)** | **Rate* (95% CI)** | **IRR** (95%CI)** | ***p-value*** |
| Practical and physical needs | 0.33 (0.28-0.38) | 0.21 (0.20-0.22) | 1.54 (1.26-1.88) | ***<0.001*** |
| Lifestyle changes | 0.28 (0.14-0.42) | 0.18 (0.15-0.21) | 1.49 (0.81-2.74) | *0.203* |
| Psychosocial issues | 0.33 (0.27-0.39) | 0.18 (0.17-0.19) | 1.77 (1.43-2.19) | ***<0.001*** |
| Information needs | 0.18 (0.12-0.24) | 0.16 (0.15-0.17) | 1.15 (0.78-1.72) | *0.495* |
| Overall SNAC | 0.30 (0.27-0.33) | 0.19 (0.18-0.20) | 1.56 (1.37-1.78) | ***<0.001*** |

Note: Bold values denote statistical significance at the p-value < 0.05 level; * The rate of moderate-to-high unmet needs was calculated using the number of moderate-to-high items in a subscale or overall in the numerator divided by the total number of items in that subscale or overall as the denominator; ** Unadjusted incidence rate ratios (IRR) with non-Indigenous as reference

**Supplementary Table 2**. The prevalence of moderate-to-high unmet supportive care needs reported by patients with cirrhosis according to Indigenous status

| **SNAC Subscales** | **Indigenous** | | **Non-Indigenous** | | |  |
| --- | --- | --- | --- | --- | --- | --- |
| **N=20** | | **N=438** | | |  |
|  | **N** | **(%)** | **N** | | **(%)** | **p-value*** |
| **Practical and physical needs** |  |  |  | |  |  |
| Have extra costs involved in managing your liver condition | 6 | (30) | 76 | | (17) | 0.15 |
| Have any issues with transport getting to and from medical appointments for your liver condition | 5 | (25) | 74 | | (17) | 0.36 |
| Have difficulty with daily tasks around the house (e.g. washing, cooking, raking the yard, sweeping the floor) | 8 | (40) | 107 | | (24) | 0.12 |
| Have trouble making a medical appointment or filling in forms due to language barriers | 1 | (5) | 9 | | (2) | 0.36 |
| Did your job performance decrease because of your health | 6 | (30) | 80 | | (18) | 0.19 |
| Feel unwell | 9 | (45) | 132 | | (30) | 0.16 |
| Have lack of energy, tiredness | 12 | (60) | 159 | | (36) | **0.032** |
| Sleep poorly | 11 | (55) | 157 | | (36) | 0.082 |
| Have confusion, disorientation, personality changes | 5 | (25) | 76 | | (17) | 0.37 |
| Have decreased ability to get around | 8 | (40) | 83 | | (19) | **0.021** |
| Have swelling of the ankles and legs | 4 | (20) | 98 | | (22) | 1.00 |
| Have itchy skin | 6 | (30) | 92 | | (21) | 0.34 |
| Have loss of appetite, nausea or vomiting | 7 | (35) | 85 | | (19) | 0.089 |
| Have ascites (fluid build-up in the abdomen/belly) | 4 | (20) | 96 | | (22) | 1.00 |
| Have easy bruising, bleeding, thinning of the skin | 5 | (25) | 79 | | (18) | 0.43 |
| Have side effects of treatment (e.g. frequent or loose bowel motions, bloating and abdominal discomfort) | 7 | (35) | 75 | | (17) | **0.041** |
| **Lifestyle changes** |  |  |  | |  |  |
| Make lifestyle changes to increase exercise, lose weight, stop or limit alcohol | 3 | (15) | 75 | | (17) | 1.00 |
| Make diet changes (e.g. low salt diet or decrease portion size) | 8 | (40) | 87 | | (19) | **0.030** |
| **Psychosocial issues** |  |  |  | |  |  |
| Have fear of the unknown or uncertainty about the future | 8 | (40) | 98 | | (22) | 0.068 |
| Have any feelings about death and dying | 5 | (25) | 67 | | (15) | 0.22 |
| Feel down or depressed | 9 | (45) | | 100 | (23) | **0.023** |
| Feel lonely | 9 | (45) | | 56 | (13) | **<0.001** |
| Feel confused about managing your liver condition | 5 | (25) | | 50 | (11) | 0.078 |
| Feel frustrated | 7 | (35) | | 95 | (22) | 0.16 |
| Have anxiety and/or stress | 10 | (50) | | 113 | (26) | **0.017** |
| Have aggression, irritability, anger | 3 | (15) | | 57 | (13) | 0.74 |
| Have lack of interest, no “get up and go” | 6 | (30) | | 101 | (23) | 0.47 |
| Feel ashamed or embarrassed because of social stigma | 2 | (10) | | 38 | (9) | 0.69 |
| Have fears about losing your independence | 5 | (25) | | 64 | (15) | 0.20 |
| Fear being a burden to those close to you | 6 | (30) | | 75 | (17) | 0.14 |
| Worry about the worries of those close to you | 9 | (45) | | 97 | (22) | **0.018** |
| Worry about your illness getting worse (e.g. developing liver cancer) | 7 | (35) | | 116 | (27) | 0.40 |
| **Information needs** |  |  | |  |  |  |
| Obtain information to use at home about how to manage your illness and complications | 2 | (10) | | 81 | (19) | 0.55 |
| Have tests/procedures explained | 6 | (30) | | 62 | (14) | 0.051 |
| Have benefits and side-effects of treatment explained | 4 | (20) | | 67 | (15) | 0.53 |
| Access professional help/counselling (e.g. from a social worker, psychologist, nurse specialist) | 4 | (20) | | 70 | (16) | 0.55 |
| Know who to call and when to call for medical help | 2 | (10) | | 39 | (9) | 0.70 |
| Were you informed about things you can do to help yourself to get well | 5 | (25) | | 84 | (19) | 0.56 |
| Were you informed about support groups in your area | 2 | (10) | | 73 | (17) | 0.76 |

Note: Number and percentage (%); Bold values denote statistical significance at the p-value < 0.05 level; * Pearson chi-squared or Fisher’s exact test (for sparse tables)

**Supplementary Table 3**. Linear regression coefficient for overall SNAC scores, and for ‘Practical and physical needs’, ‘Lifestyle changes’, ‘Psychosocial issues’, and ‘Information needs’ scores by independent demographic and clinical variables

| **Variables included in the model** | **Overall SNAC Score** | | | | **Practical and physical needs** | | | | **Lifestyle changes** | | | | **Psychosocial issues** | | | | **Information needs** | | | |
| --- | --- | --- | --- | --- | --- | --- | --- | --- | --- | --- | --- | --- | --- | --- | --- | --- | --- | --- | --- | --- |
| **β** | **95%** | **CI** | **p-value** | **β** | **95%** | **CI** | **p-value** | **β** | **95%** | **CI** | **p-value** | **β** | **95%** | **CI** | **p-value** | **β** | **95%** | **CI** | **p-value** |
| **Indigenous status** |  |  |  |  |  |  |  |  |  |  |  |  |  |  |  |  |  |  |  |  |
| Non-Indigenous | ref | 1.00 |  |  | ref | 1.00 |  |  | ref | 1.00 |  |  | ref | 1.00 |  |  | ref | 1.00 |  |  |
| Indigenous | 0.22 | -0.08 | 0.52 | 0.145 | 0.32 | -0.02 | 0.66 | 0.063 | 0.15 | -0.36 | 0.66 | 0.565 | 0.44 | 0.03 | 0.86 | **0.036** | -0.02 | -0.43 | 0.38 | 0.911 |
| **Recruitment hospital** |  |  |  |  |  |  |  |  |  |  |  |  |  |  |  |  |  |  |  |  |
| PA Hospital | ref | 1.00 |  |  | ref | 1.00 |  |  | ref | 1.00 |  |  | ref | 1.00 |  |  | ref | 100 |  |  |
| A | 0.09 | -0.08 | 0.26 | 0.311 | 0.06 | -0.13 | 0.25 | 0.552 | 0.12 | -0.17 | 0.41 | 0.405 | -0.03 | -0.27 | 0.21 | 0.797 | 0.20 | -0.03 | 0.43 | 0.086 |
| B | 0.14 | -0.08 | 0.36 | 0.203 | 0.21 | -0.03 | 0.46 | 0.088 | 0.03 | -0.34 | 0.40 | 0.862 | 0.10 | -0.20 | 0.40 | 0.525 | 0.22 | -0.07 | 0.51 | 0.141 |
| C | 0.30 | 0.07 | 0.53 | **0.011** | 0.07 | -0.19 | 0.33 | 0.598 | 0.35 | -0.04 | 0.75 | 0.081 | 0.33 | 0.01 | 0.65 | **0.046** | 0.46 | 0.14 | 0.80 | **0.004** |
| D | 0.08 | -0.15 | 0.31 | 0.486 | 0.14 | -0.12 | 0.40 | 0.281 | 0.16 | -0.23 | 0.54 | 0.429 | -0.08 | -0.40 | 0.24 | 0.619 | 0.11 | -0.20 | 0.41 | 0.501 |
| **Age-group** |  |  |  |  |  |  |  |  |  |  |  |  |  |  |  |  |  |  |  |  |
| 18-64 years | ref | 1.00 |  |  | ref | 1.00 |  |  | ref | 1.00 |  |  | ref | 1.00 |  |  | ref | 1.00 |  |  |
| 65+ years | -0.28 | -0.42 | -0.13 | **<0.001** | -0.30 | -0.50 | -0.13 | **<0.001** | -0.41 | -0.66 | -0.16 | **0.001** | -0.31 | -0.51 | -0.11 | **0.003** | -0.09 | -0.29 | 0.10 | 0.355 |
| **Marital status/live alone** |  |  |  |  |  |  |  |  |  |  |  |  |  |  |  |  |  |  |  |  |
| Have a partner, do not live alone | ref | 1.00 |  |  | ref | 1.00 |  |  | ref | 1.00 |  |  | ref | 1.00 |  |  | ref | 1.00 |  |  |
| No partner, do not live alone | 0.23 | 0.07 | 0.38 | **0.005** | 0.24 | 0.06 | 0.42 | **0.008** | 0.22 | -0.04 | 0.49 | 0.101 | 0.36 | 0.14 | 0.57 | **0.001** | 0.09 | -0.12 | 0.30 | 0.420 |
| No partner, live alone | -0.02 | -0.18 | 0.13 | 0.782 | -0.05 | -0.22 | 0.13 | 0.591 | 0.05 | -0.22 | 0.31 | 0.714 | -0.06 | -0.27 | 0.16 | 0.615 | -0.03 | -0.24 | 0.18 | 0.752 |
| **Child-Pugh class** |  |  |  |  |  |  |  |  |  |  |  |  |  |  |  |  |  |  |  |  |
| A | ref | 1.00 |  |  | ref | 1.00 |  |  | ref | 1.00 |  |  | ref | 1.00 |  |  | ref | 1.00 |  |  |
| B | 0.38 | 0.22 | 0.54 | **<0.001** | 0.62 | 0.44 | 0.80 | **<0.001** | 0.46 | 0.19 | 0.73 | **0.001** | 0.41 | 0.19 | 0.63 | **<0.001** | 0.03 | -0.18 | 0.25 | 0.751 |
| C | 0.48 | 0.28 | 0.70 | **<0.001** | 1.07 | 0.84 | 1.30 | **<0.001** | 0.39 | 0.04 | 0.74 | **0.029** | 0.54 | 0.26 | 0.83 | **<0.001** | -0.08 | -0.35 | 0.20 | 0.592 |
| **Place of residence** |  |  |  |  |  |  |  |  |  |  |  |  |  |  |  |  |  |  |  |  |
| Major city | ref | 1.00 |  |  | ref | 1.00 |  |  | ref | 1.00 |  |  | ref | 1.00 |  |  | ref | 1.00 |  |  |
| Outside major city area | -0.16 | -0.35 | 0.03 | 0.105 | -0.08 | -0.30 | 0.14 | 0.477 | -0.23 | -0.55 | 0.10 | 0.173 | 0.03 | -0.23 | 0.30 | 0.802 | -0.36 | -0.62 | -0.10 | **0.006** |
| **Diabetes** (no) | 0.05 | -0.09 | 0.19 | 0.508 | 0.08 | -0.08 | 0.24 | 0.328 | 0.06 | -0.19 | 0.30 | 0.642 | 0.09 | -0.11 | 0.28 | 0.398 | -0.03 | -0.22 | 0.16 | 0.754 |
| **Primary diagnosis** |  |  |  |  |  |  |  |  |  |  |  |  |  |  |  |  |  |  |  |  |
| Alcohol | ref | 1.00 |  |  | ref | 1.00 |  |  | ref | 1.00 |  |  | ref | 1.00 |  |  | ref | 1.00 |  |  |
| HCV | 0.02 | -0.15 | 0.19 | 0.795 | 0.09 | -0.10 | 0.28 | 0.345 | -0.06 | -0.35 | 0.23 | 0.687 | 0.01 | -0.22 | 0.25 | 0.913 | 0.04 | -0.18 | 0.27 | 0.706 |
| NAFLD/NASH | 0.21 | 0.02 | 0.40 | **0.027** | 0.28 | 0.07 | 0.49 | **0.009** | 0.43 | 0.11 | 0.75 | **0.009** | -0.01 | -0.27 | 0.26 | 0.973 | 0.14 | -0.11 | 0.40 | 0.263 |
| other | 0.10 | -0.15 | 0.36 | 0.426 | 0.36 | 0.08 | 0.65 | **0.013** | -0.10 | -0.54 | 0.33 | 0.641 | 0.18 | -0.17 | 0.54 | 0.309 | -0.03 | -0.38 | 0.31 | 0.861 |
| HBV | -0.12 | -0.41 | 0.17 | 0.418 | -0.06 | -0.38 | 0.27 | 0.733 | -0.03 | -0.52 | 0.46 | 0.896 | -0.02 | -0.41 | 0.38 | 0.940 | -0.37 | -0.76 | 0.02 | 0.062 |

Note: Reference category (ref) in bracket unless specified; Bold values denote statistical significance at the p-value < 0.05 level; Multivariable linear regression adjusted for Child-Pugh, age group, recruitment hospital, marital/live alone, place of residence, diabetes, and primary diagnosis
